# Supplementary material for: Host-Specific Effects of Arbuscular Mycorrhizal Fungi on Two Caragana Species in Desert Grassland
Source: MDPI journal article supplement (doi:10.3390/jof7121077), 2021-12-15
Supplement: s1 [file s1]

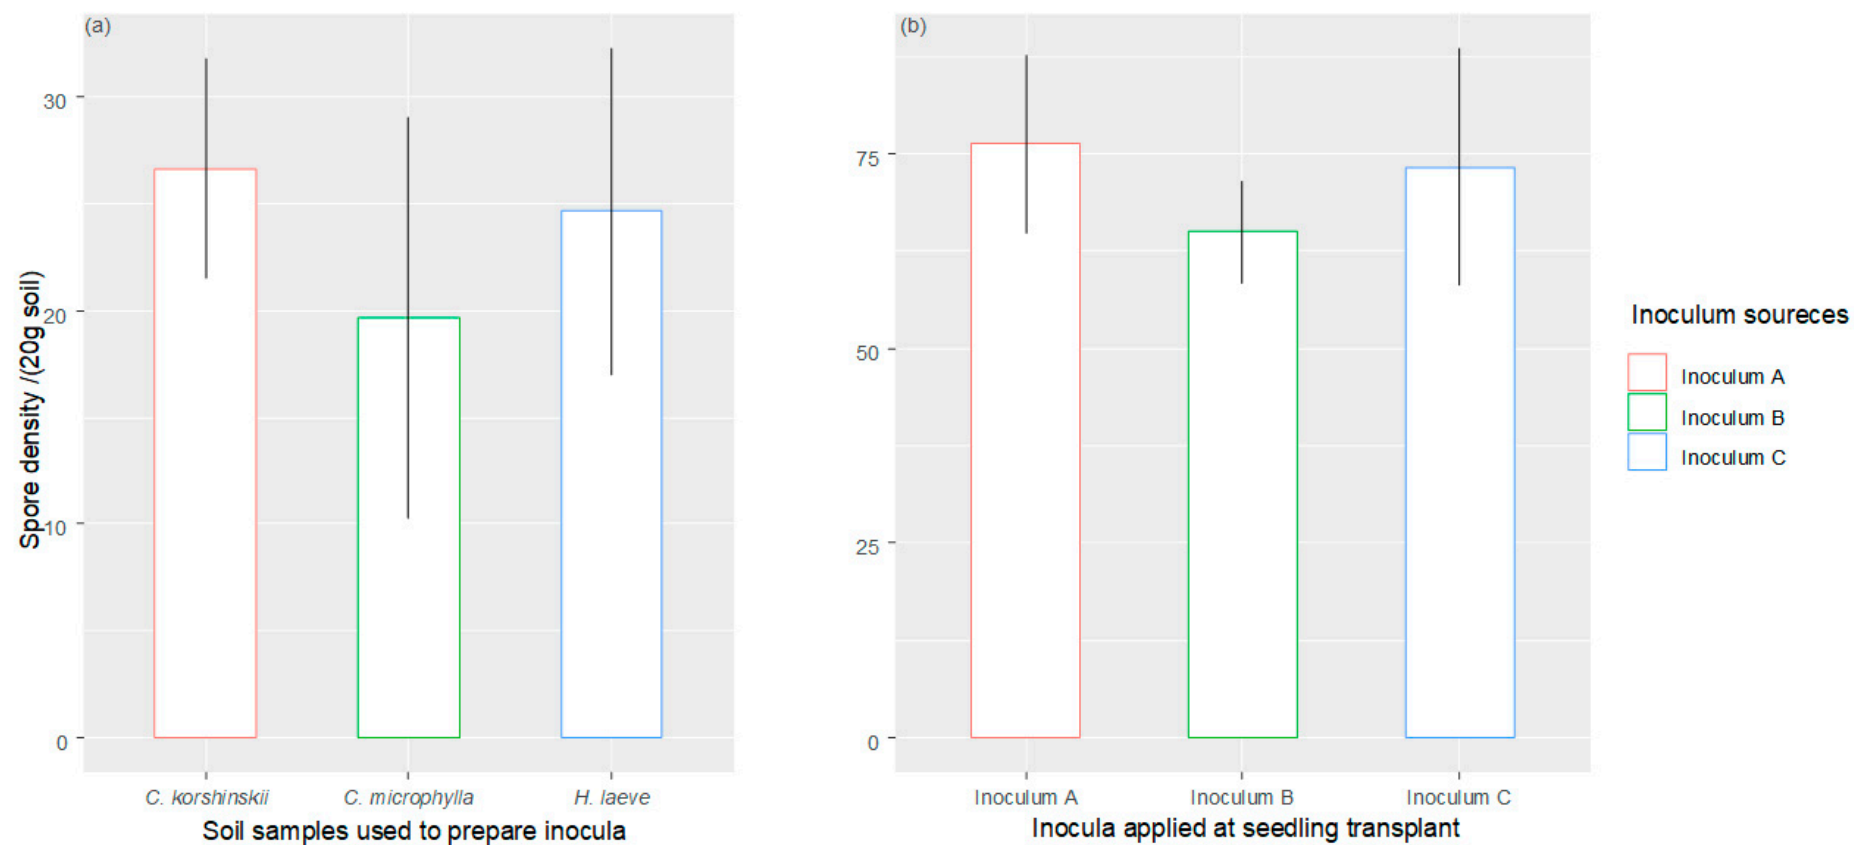

**Figure S1.** Spore density of AMF in soil samples taken in 2014 (a) and AMF inoculum *C. korshinskii* (A), *H. laeve* (B) and *C. microphylla* (C) prepared in 2016 (b). Spores were extracted from 20g soil samples and then counted.

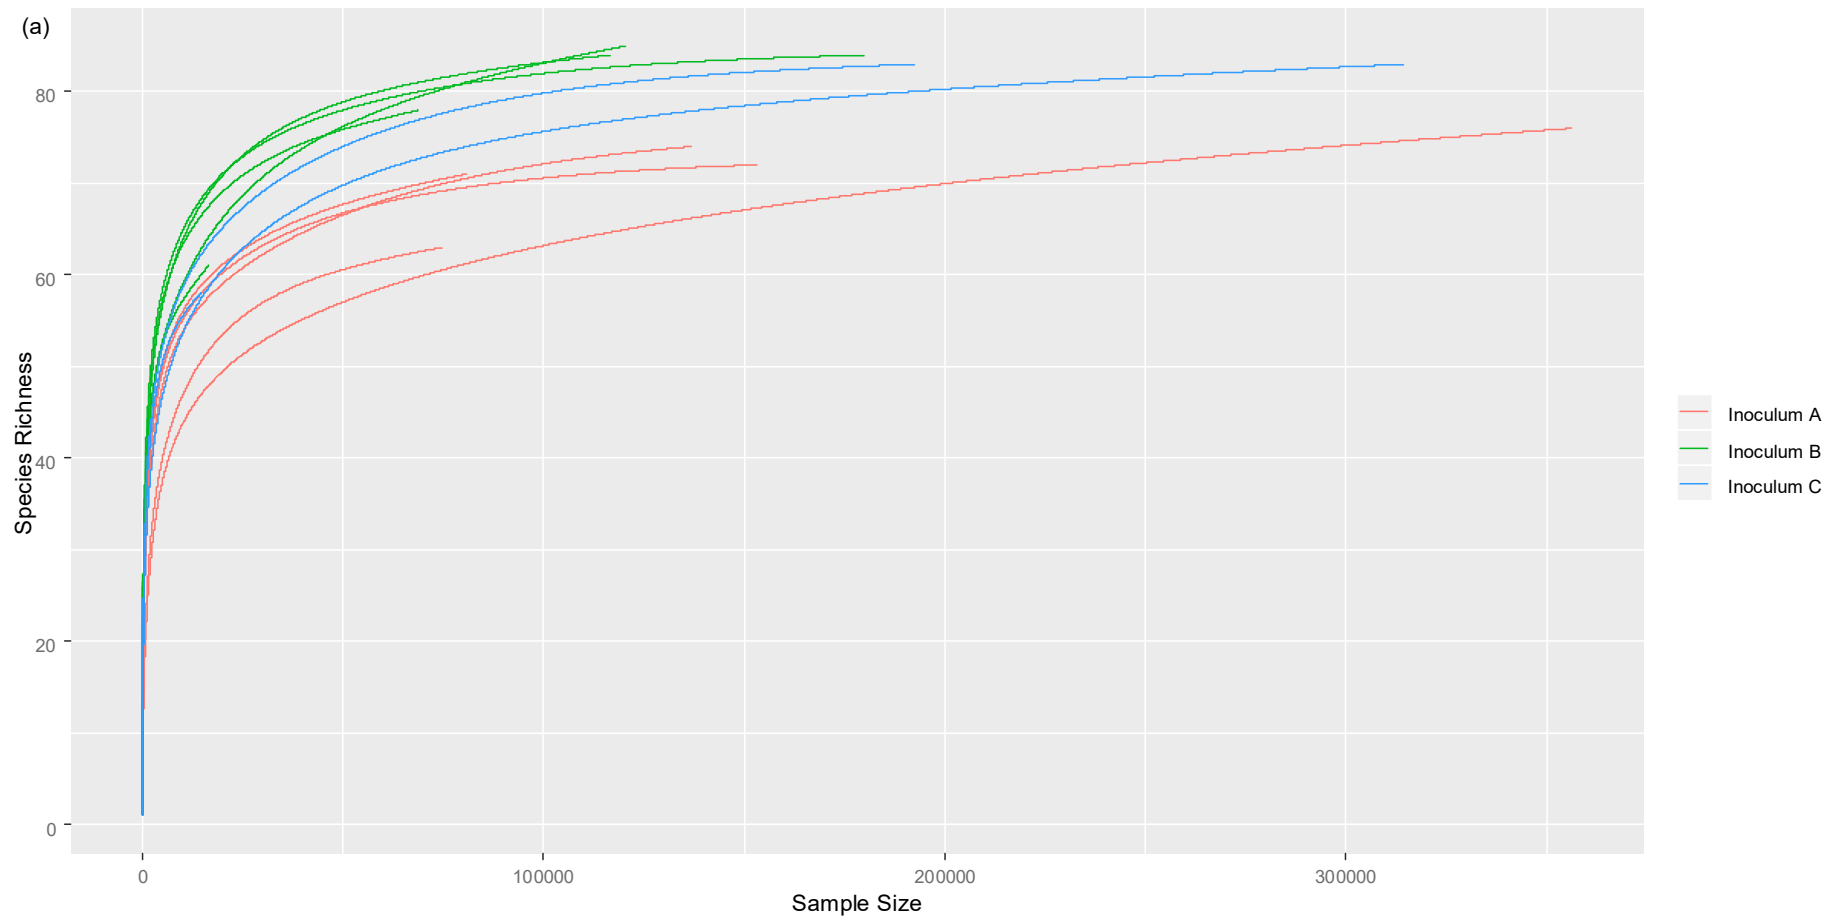

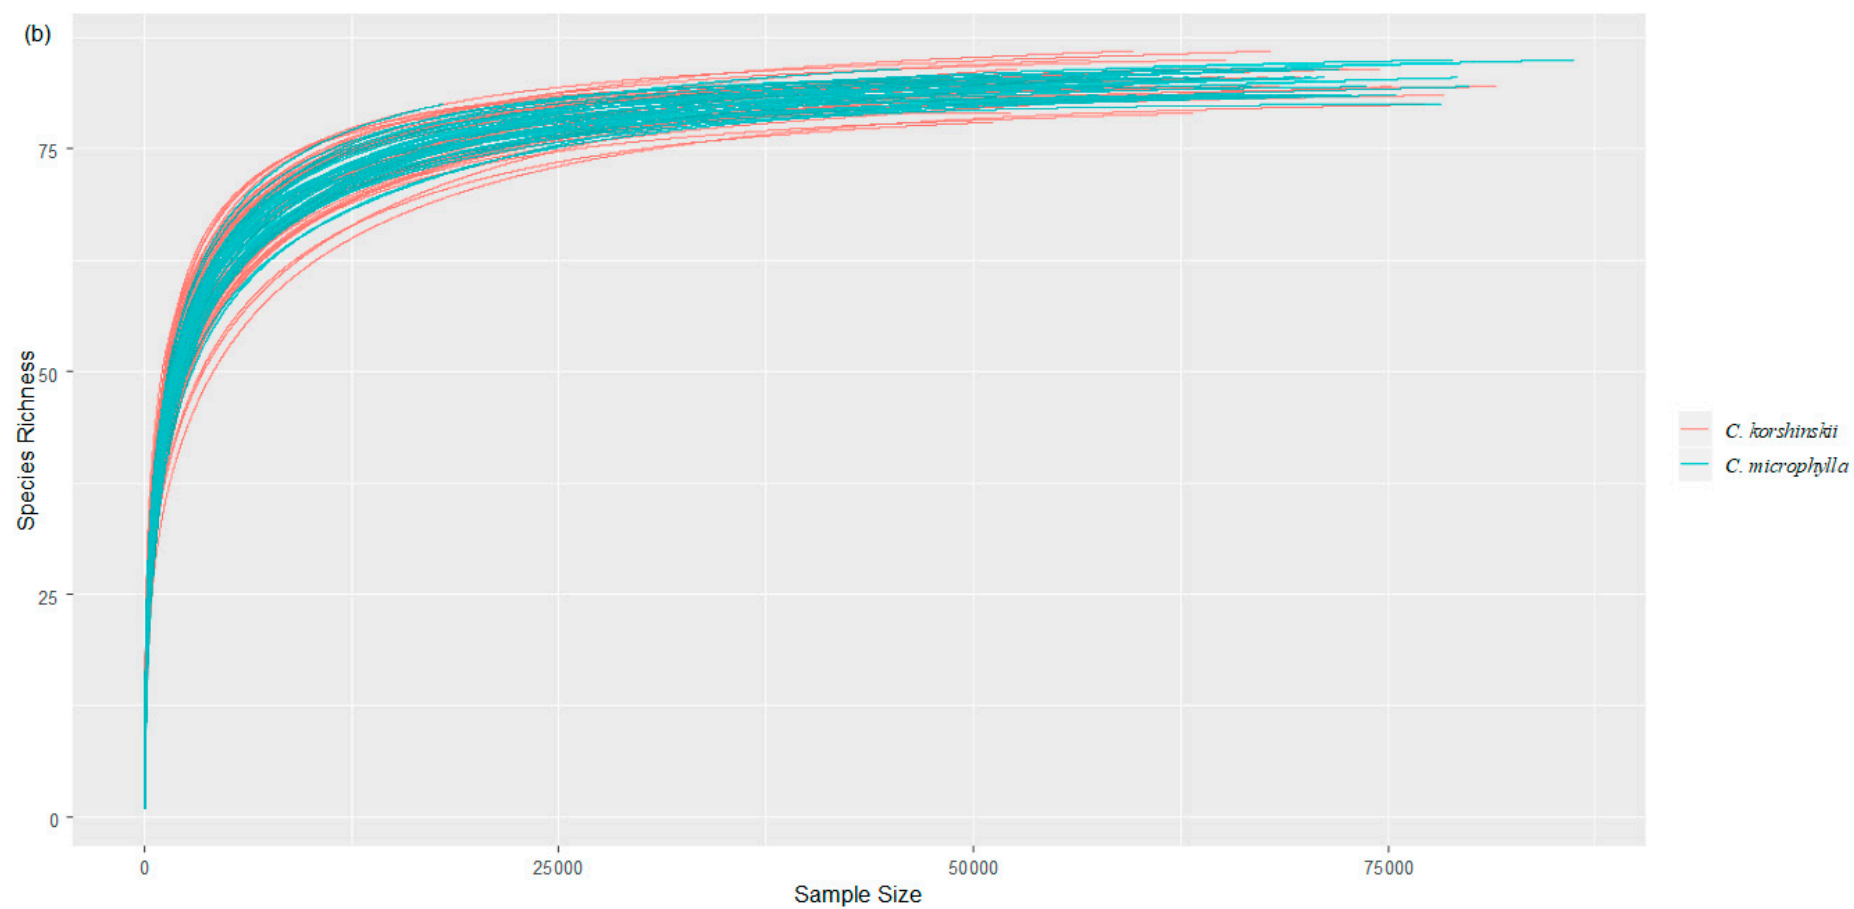

**Figure S2.** Rarefaction curves of AMF species richness along the number of sequences obtained from the 3 inocula (a) and rhizospheres of 2 *Caragana* plant roots (b). The rarefaction curve suggested that our sampling captured most of the AMF community.

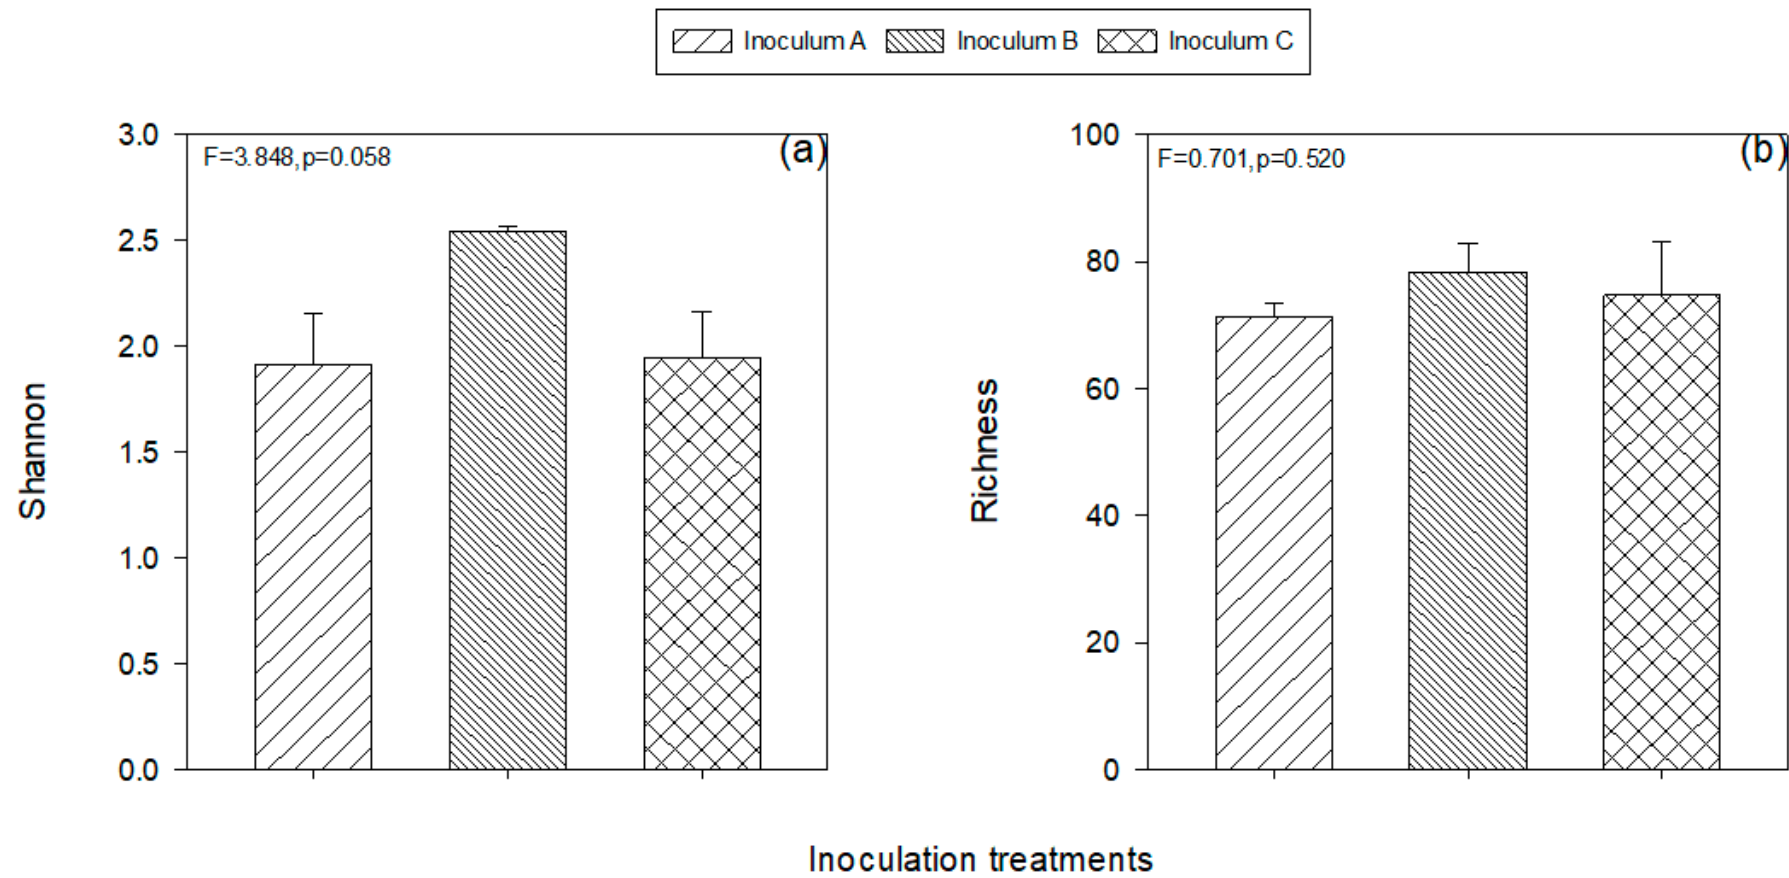

**Figure S3.** Shannon diversity (a) and species richness (b) of AMF community associated with inoculum A, B, and C. No significant difference was found among the inoculum A, B and C.

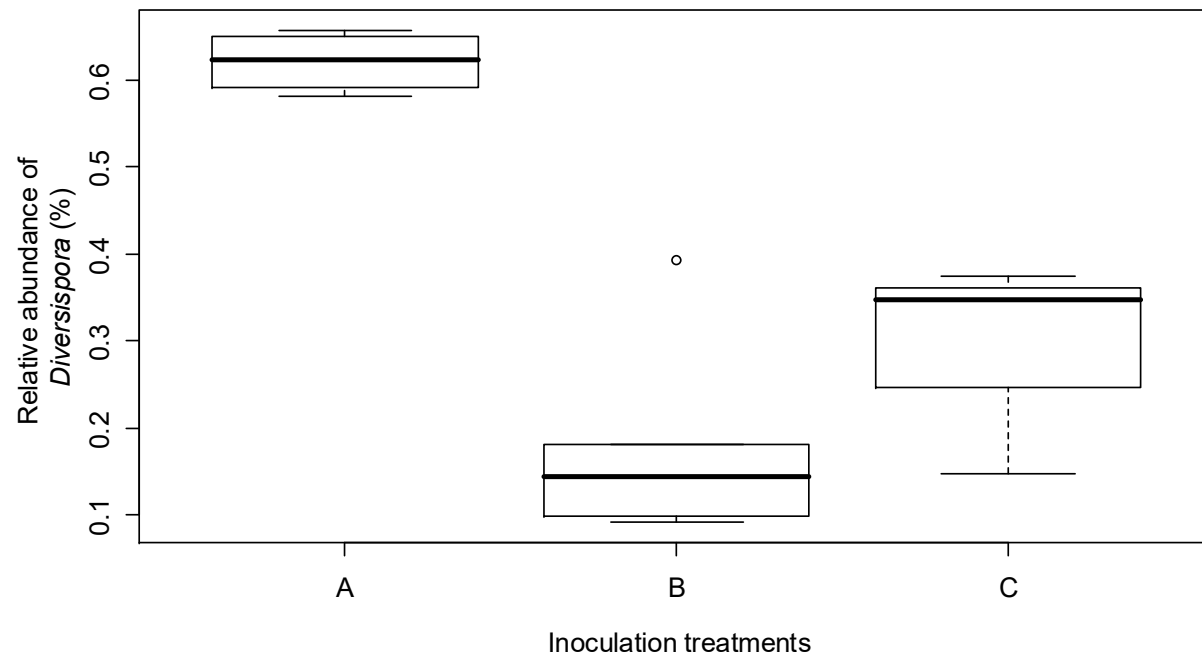

**Figure S4.** The relative abundance of AMF belonging to *Diversispora* associated with 3 inocula. Apparently, *Diversispora* was significantly enriched in inoculum A.

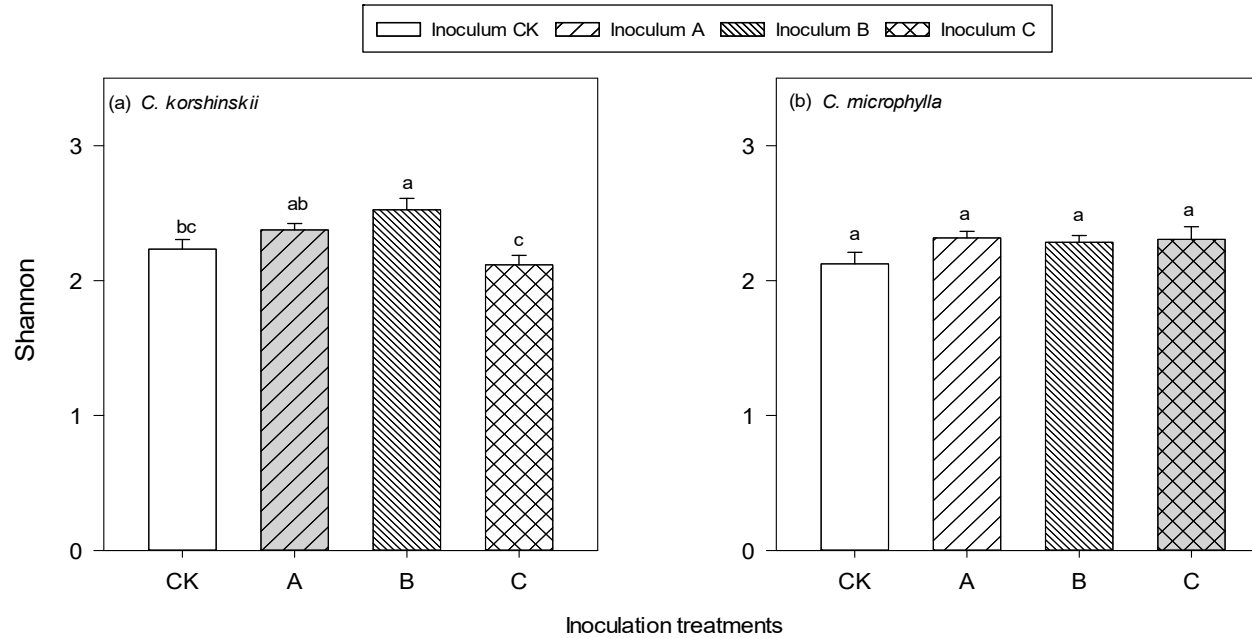

**Figure S5.** Shannon diversity of AMF associated with *C. korshinskii*, and *C. microphylla* plants with different AMF inoculation treatments. Inoculation treatments including inocula originating from rhizosphere of *C. korshinskii* (A), *H. leave* (B), *C. microphylla* (C), and sterilized control (CK). Bars indicate means with standard error (n=10). Different letters above bars indicated significant differences at  $P < 0.05$  level according to Tukey's test. Gray bars indicated home AMF and plant combinations. A two-way ANOVA revealed significant effects of inoculum sources ( $F=5.027$ ,  $P=0.003$ ) but not host plant species on the Shannon diversity of AMF. The interaction between host plant species and inoculum sources was not significant ( $F=3.901$ ,  $P=0.012$ ).

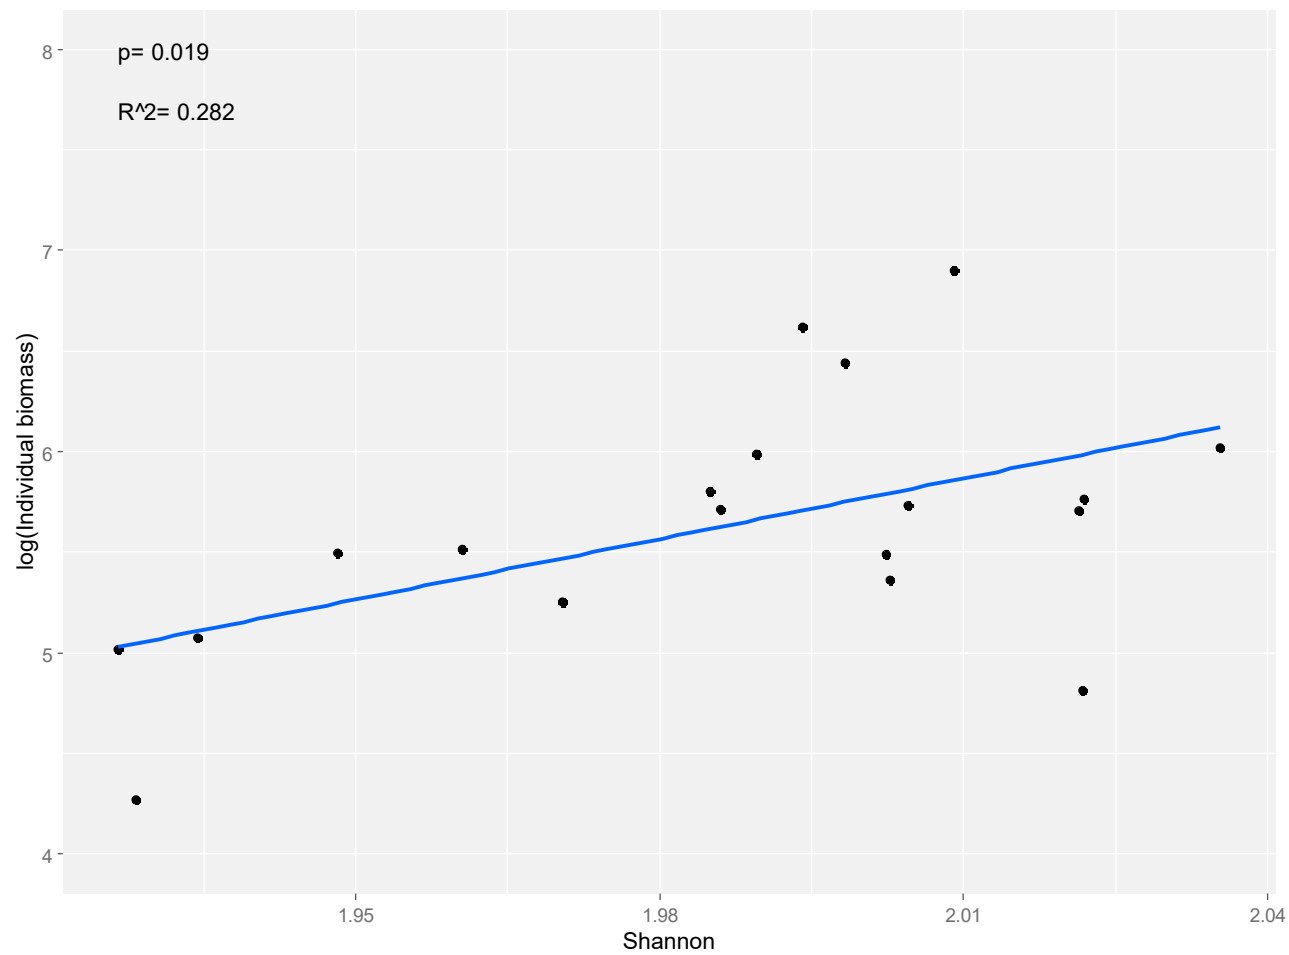

**Figure S6.** Linear regression indicating a significant positive relationship between *C. korshinskii* plant shoot biomass and the Shannon diversity of rhizosphere AMF community.

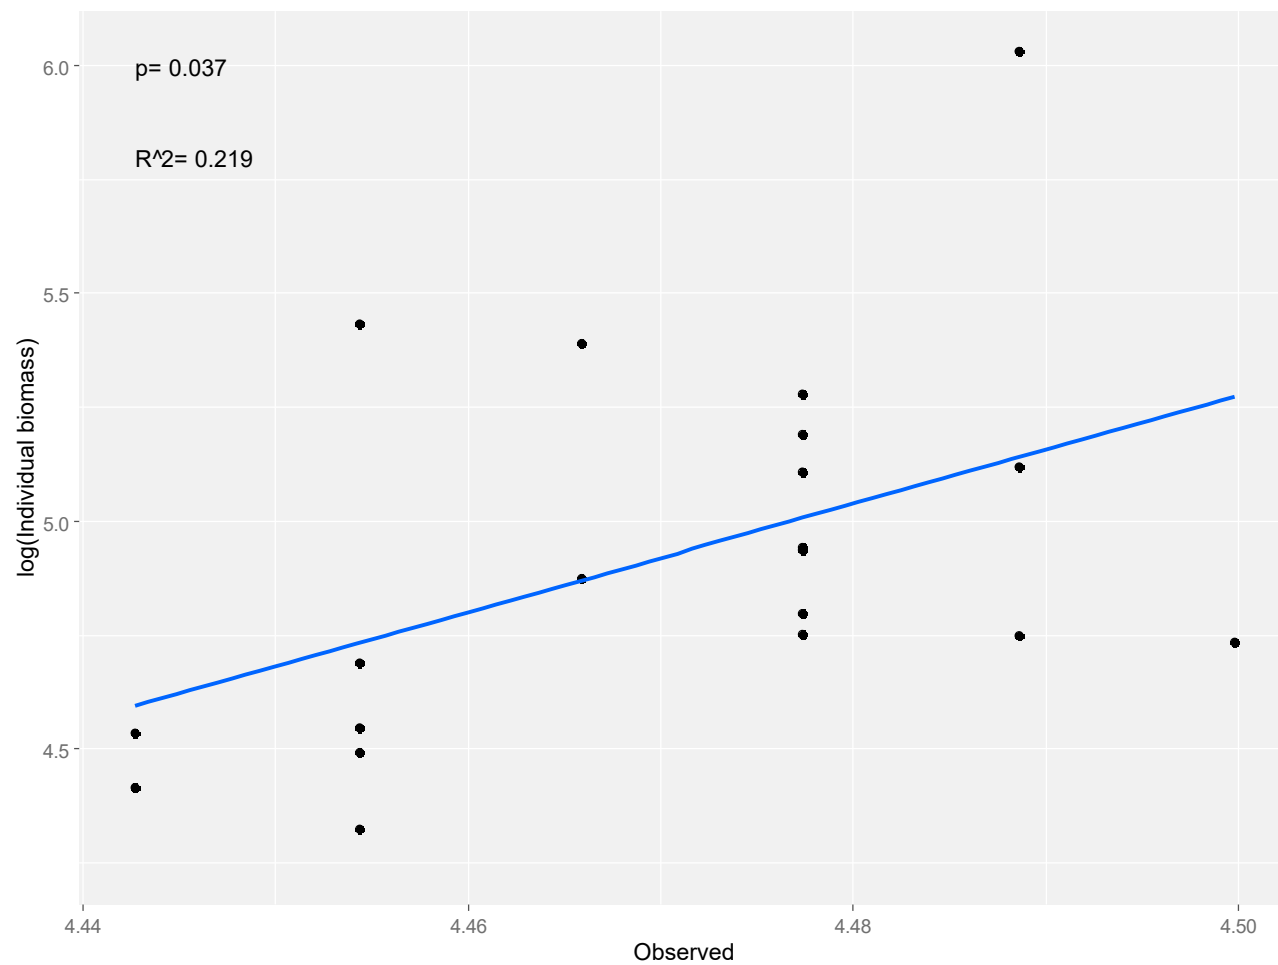

**Figure S7.** Linear regression indicating a significant positive relationship between *C. microphylla* plant shoot biomass and the richness of rhizosphere AMF community.



**Table S1.** Results of indicator species analysis of AMF genus associated with 3 inocula. Strongly correlated with the plant biomass, *Diversispora* was the indicator of inoculum A.

| Genus                  | A      | B      | C      | best | P      |
|------------------------|--------|--------|--------|------|--------|
| <i>Glomus</i>          | 0.9999 | 0.1245 | 0.0081 | C    | 0.0241 |
| <i>Diversispora</i>    | 0.0004 | 0.9866 | 0.8453 | A    | 0.0012 |
| <i>Claroideoglomus</i> | 0.0003 | 0.9566 | 0.8882 | A    | 0.0009 |
| <i>Archaeospora</i>    | 0.9562 | 0.0001 | 0.9981 | B    | 0.0003 |

**Table S2.** Results of indicator species analysis of AMF OTUs associated with two host species. Among 35 significant indicators OTUs, 17 OTUs were the indicator of *C. korshinskii* and 18 OTUs were the indicator of *C. microphylla*.

|         | <i>C.</i><br><i>korshinskii</i> | <i>C.</i><br><i>microphylla</i> | best | P      |
|---------|---------------------------------|---------------------------------|------|--------|
| OTU_122 | 1.0000                          | 0.0001                          | 2    | 0.0002 |
| OTU_10  | 1.0000                          | 0.0001                          | 2    | 0.0002 |
| OTU_117 | 1.0000                          | 0.0001                          | 2    | 0.0002 |
| OTU_101 | 1.0000                          | 0.0002                          | 2    | 0.0004 |
| OTU_27  | 1.0000                          | 0.0001                          | 2    | 0.0002 |
| OTU_23  | 0.9762                          | 0.0239                          | 2    | 0.0472 |
| OTU_70  | 0.0003                          | 0.9998                          | 1    | 0.0006 |
| OTU_3   | 0.0001                          | 1.0000                          | 1    | 0.0002 |
| OTU_15  | 0.0005                          | 0.9996                          | 1    | 0.0010 |
| OTU_174 | 0.0011                          | 0.9990                          | 1    | 0.0022 |
| OTU_100 | 0.0016                          | 0.9985                          | 1    | 0.0032 |
| OTU_107 | 0.0002                          | 0.9999                          | 1    | 0.0004 |
| OTU_17  | 0.0002                          | 0.9999                          | 1    | 0.0004 |
| OTU_45  | 0.0131                          | 0.9875                          | 1    | 0.0260 |
| OTU_139 | 0.0241                          | 0.9776                          | 1    | 0.0476 |
| OTU_181 | 0.9999                          | 0.0002                          | 2    | 0.0004 |
| OTU_55  | 0.9999                          | 0.0003                          | 2    | 0.0006 |
| OTU_124 | 0.9954                          | 0.0047                          | 2    | 0.0094 |
| OTU_151 | 1.0000                          | 0.0001                          | 2    | 0.0002 |
| OTU_190 | 1.0000                          | 0.0001                          | 2    | 0.0002 |

|         |        |        |   |        |
|---------|--------|--------|---|--------|
| OTU_83  | 0.9983 | 0.0019 | 2 | 0.0038 |
| OTU_143 | 1.0000 | 0.0001 | 2 | 0.0002 |
| OTU_1   | 0.9990 | 0.0011 | 2 | 0.0022 |
| OTU_183 | 0.9985 | 0.0017 | 2 | 0.0034 |
| OTU_104 | 1.0000 | 0.0001 | 2 | 0.0002 |
| OTU_148 | 1.0000 | 0.0001 | 2 | 0.0002 |
| OTU_172 | 1.0000 | 0.0001 | 2 | 0.0002 |
| OTU_42  | 0.0001 | 1.0000 | 1 | 0.0002 |
| OTU_24  | 0.0001 | 1.0000 | 1 | 0.0002 |
| OTU_73  | 0.0001 | 1.0000 | 1 | 0.0002 |
| OTU_114 | 0.0001 | 1.0000 | 1 | 0.0002 |
| OTU_16  | 0.0001 | 1.0000 | 1 | 0.0002 |
| OTU_208 | 0.0178 | 0.9948 | 1 | 0.0353 |
| OTU_6   | 0.0055 | 0.9979 | 1 | 0.0110 |
| OTU_19  | 0.0156 | 0.9861 | 1 | 0.0310 |

---

**Table S3.** Standardized total effects of the SEM. According to the total effects, inoculum A influenced the *C. korshinskii* plant N, P uptake and shoot biomass.

|               | Inoculum A | <i>Diversispora</i> | Foliar.P | Foliar.N |
|---------------|------------|---------------------|----------|----------|
| Diversispora  | 0.480      | 0.000               | 0.000    | 0.000    |
| Foliar.P      | 0.603      | 0.000               | 0.000    | 0.000    |
| Foliar.N      | 0.436      | 0.000               | 0.000    | 0.000    |
| Shoot biomass | 0.486      | 0.667               | 0.465    | -0.262   |
